# Supplementary material
Source: PubMed Central journal article supplement (PMC4833217)
Supplement: mmc1.pdf [file mmc1.pdf]

**Supplemental Data**

***GTF2E2* Mutations Destabilize the General  
Transcription Factor Complex TFIIIE in Individuals  
with DNA Repair-Proficient Trichothiodystrophy**

**Christiane Kuschal, Elena Botta, Donata Orioli, John J. Digiovanna, Sara Seneca, Kathelijn Keymolen, Deborah Tamura, Elizabeth Heller, Sikandar G. Khan, Giuseppina Caligiuri, Manuela Lanzafame, Tiziana Nardo, Roberta Ricotti, Fiorenzo A. Peverali, Robert Stephens, Yongmei Zhao, Alan R. Lehmann, Laura Baranello, David Levens, Kenneth H. Kraemer, and Miria Stefanini**

## **Supplemental Note: Case Reports:**

### **Clinical descriptions of affected children**

#### **TTD379BE (IV-1 in Figure 1C)**

TTD379BE a 10y/o Asian boy was diagnosed with TTD at age 1 year (Figure S1). He was born in India at term with low birth weight (2.4 kg - 10<sup>th</sup> percentile). As with other individuals with TTD<sup>1-3</sup> the pregnancy was complicated by mild intrauterine growth retardation (diagnosed at 34 weeks in gestation by ultrasound exam). At birth the skin was normal with no collodion membrane as seen in some TTD patients. He had an unremarkable neonatal period with no feeding problems, no sun sensitivity and no increase in infections during first year of life. However he was noted to have very dry skin and sparse slow growing hair. His gross motor development was delayed: attained head control at age 5 months, crawled at 8 months and walked at 3 years. At age 2 years he was found to be myopic and developed esotropia that was surgically corrected at age 5 years. He had cognitive delays at age 3 years. He has had no other hospitalizations, serious illnesses or additional surgery. At age 10 years he attended special education classes in public school and received physical, speech and occupational therapies. He is described as a very happy, overly friendly child who has a difficult time staying on task in class.

Clinical evaluations at age 10 years: well-developed well-nourished Indian male child who appeared younger than his chronologic age (Figure 1A). His height was 120 cm [<3rd percentile], weight 19.8 kg [<3rd percentile] and head circumference 45.9 [<3rd percentile]. He had mild micrognathia, low set ears and triangular head consistent with craniosynostosis. His scalp hair was short, thick, brittle and stuck out in several directions. His hair showed typical alternating dark and light "tiger tail" banding on polarized microscopy (Figure 1B). His eyebrows were short but his eyelashes were long and full. He had several small nevi on his face, lip and abdomen but did not have the large number of freckle-like pigmented lesions in sun exposed sites that are present in individuals with xeroderma pigmentosum (XP)<sup>4</sup> (Table 1 and Figure S1). There was thick coarse ichthyosiform scaling most prominently over the chest and abdomen and anterior lower legs. He

had hyperlinear palms and soles. The nail plates were within normal limits; they were not thin or peeling. His eyes had nystagmus and strabismus with residual small-angle esotropia following eye muscle surgery. He had micro-cornea with mild myopic astigmatism. There was no evidence of lenticular opacities.

Neurological evaluation showed abnormal long tract signs and cerebellar dysfunction. His deep tendon reflexes were 1-2+ with 2 beats of clonus elicited at the ankles. Fine motor skills were delayed for age. He ambulated with increased base and pronated his feet with spastic-ataxic gait. He had marked cognitive delays including a speech articulation disorder with features of attention deficit disorder. Formal IQ testing was not performed. Audiometric thresholds indicated slight hearing loss bilaterally which was suggested to be sensorineural because of normal tympanometry and absent DPOAEs.

His parents are first cousins. Both parents (III-3 and III-4 in Figure 1C) and his brother (IV-2 in Figure 1C) are clinically normal (Figure 1C).

Laboratory: Routine blood chemistries including electrolytes, liver and renal function tests were within normal limits as was a urinalysis and assessment for thyroid and parathyroid hormone levels. Hemoglobin and hematocrit were normal. However the MCV was reduced: MCV – 64.5 [normal 74.4-86.1] and his hemoglobin electrophoresis was abnormal: Hb A – 91.7 [normal 94.8-97.8] HgbA2 – 6.8 [normal 2.2-3.2] Hb F – 1.5 [normal 0.0-2.0] (Figure S1) as described in other individuals with TTD.<sup>5</sup>

X-ray exam showed no evidence of osteosclerosis, osteopenia or hip abnormality as seen in some individuals with TTD.<sup>1,2</sup> However, he had probable craniosynostosis of coronal sutures. His bone age was normal [chronological age is 10 years and 3 months – the bone age was about 11 years] with interval maturation noted since a previous exam. CT exam showed a morphologically normal brain with no gross atrophy or calcifications. There was decreased attenuation throughout the white matter possibly representing a leukoencephalopathy. There was evidence of prior mastoiditis with persistent fluid in the left mastoid.

### **TTD28PV (V-1 in Figure 1E)**

TTD28PV a 16y/o Moroccan female weighed 3110g at 38.5 weeks gestation (Table 1 and Figure S1).

The pregnancy was reported to be without complications. There was no notion of a collodion membrane and she was not sun sensitive. She had a patent ductus arteriosus at birth that was closed by catheterization. She had brittle hair with tiger tail banding under polarized microscopy (Figure 1D). She has lamellar ichthyosis of her skin. She could sit at 1 year, walk independently at 35 months and spoke 1 word at 33 months. She suffered from chronic rhinosinusitis but did not need hospitalization for infections or other problems. She had surgery for nasal adenoid hyperplasia. She has bilateral pes cavus with Babinski in extension. She wears glasses (-0.5 D) but has no special problems (normal fundus).

At 16 years her height (152.6 cm) and weight (39.7 kg) were <<3rd percentile. She had growth hormone deficiency (Insulin-like growth factor I /Somatomedin C 72 µg/L [normal 207-859 µg/L]) and has been treated with growth hormone with good response (increase of 6.1 cm and 7.1 kg from 2011 to 2014). Hb A2 was elevated (4.8%), Hb F 7.8% and Hb A 87%. MCV was low (61.7 fL) indicating microcytosis as seen in other TTD affected individuals<sup>1,2</sup> (Figure S1). She had an IQ of 40 and follows special education (type 2, which, in Belgium, is for children with moderate intellectual disability). She has not had any clinical seizures and EEG at age 10 years was normal. She is very friendly, always laughing with good social interaction.

The parents (IV-1 and IV-2 in Figure 1E) are from Morocco and are distantly related although their precise ancestry is not known. They have five other children who are phenotypically normal (V-2 to V-6 in Figure 1E).

Hearing studies were performed on TTD28PV Impedance revealed bilateral mobile tympanic membranes. The tone audiogram had a perceptive loss of 30-40 dB HL, but the results could be influenced by her intellectual disability causing less adequate responses. Acoustic oto-emissions (AOE's) for the right ear were present with decreased amplitude at 1 and 8 kHz, absent at 0.5, 2, 4 and 6 kHz. For the left ear AOE's were present at 1 kHz, and showed decreased

amplitude at 4, 6 and 8 kHz and absence at 0.5 and 2 kHz. Overall, it was concluded that she had a mild hearing loss, but no specific treatment was commenced.

MRI of the brain at 2 years and at 10 years was normal. X ray of the pelvis at 21 months showed bilateral coxa valga and delayed bone age (10 years at 13y of age).

**Supplemental Figures**

|                                           | TTD (ERCC2, XPD) Features     | TTD379BE (GTF2E2) (c.448G>C; p.Ala150Pro)    | TTD28PV (GTF2E2) (c.559G>T; p.Asp187Tyr)                       | XP (XP-D) Features            | Normal |
|-------------------------------------------|-------------------------------|----------------------------------------------|----------------------------------------------------------------|-------------------------------|--------|
| ABNORMALITIES                             | repair + TRANSCRIPTION defect | TRANSCRIPTION defect                         | TRANSCRIPTION defect                                           | REPAIR + transcription defect | Normal |
| <b>ABNORMAL CLINICAL FEATURES</b>         |                               | 10 y/o Male                                  | 16 y/o Female                                                  |                               |        |
| Dry Skin                                  | Yes                           | Yes                                          | yes                                                            | Yes                           | No     |
| Ichthyosis                                | Yes                           | Yes                                          | Yes                                                            | No                            | No     |
| Short, Brittle Hair                       | Yes                           | Yes                                          | Yes                                                            | No                            | No     |
| Tiger-Tail Banding of Hair                | Yes                           | Yes                                          | Yes                                                            | No                            | No     |
| Sulfur Deficient Hair*                    | Yes                           | Yes                                          | not known                                                      | No                            | No     |
| Nystagmus/Strabismus                      | Yes                           | Yes                                          | no                                                             | No                            | No     |
| Short Stature                             | Yes                           | Yes                                          | Yes <<3 centile                                                | No                            | No     |
| Microcephaly                              | Yes                           | Yes                                          | Yes << - 2SD                                                   | No                            | No     |
| Developmental Delay                       | Yes                           | Yes                                          | Yes IQ 40                                                      | Yes/No                        | No     |
| Happy Engaging Personality                | Yes                           | Yes                                          | Yes                                                            | No                            | No     |
| Myopia                                    | Yes                           | Yes                                          | Yes                                                            | No                            | No     |
| ADHD/Hyperactivity                        | Yes                           | Yes                                          | Hyperactive                                                    | No                            | No     |
| Ataxia                                    | Yes                           | Yes                                          | no                                                             | Yes/No                        | No     |
| Craniosynostosis                          | Yes/No                        | Yes                                          | no                                                             | No                            | No     |
| Sensorineural Deafness                    | Yes/No                        | Slight                                       | 30-40 dB hearing loss                                          | Yes                           | No     |
| Acute Burning on Minimal Sun Exposure     | Yes/No                        | No                                           | No                                                             | Yes                           | No     |
| Xerophthalmia (dry eyes)                  | Yes/No                        | No                                           | No                                                             | Yes                           | No     |
| Fever induced hair loss                   | Yes/No                        | No                                           | No                                                             | No                            | No     |
| Osteonecrosis of hips                     | Yes/No                        | No                                           | bilat coxa valga (21 mo)                                       | No                            | No     |
| Delayed bone age                          | Yes/No                        | No                                           | Yes (10 yr at 13 yr)                                           | No                            | No     |
| Undescended Testicles                     | Yes/No                        | No                                           | N/A                                                            | No                            | No     |
| Congenital Cataracts                      | Yes                           | No                                           | No                                                             | No                            | No     |
| Central Osteosclerosis                    | Yes                           | No                                           | No                                                             | No                            | No     |
| Peripheral Osteopenia - with nl Vit D     | Yes                           | No                                           | No                                                             | No                            | No     |
| Chronic Diarrhea/Constipation             | Yes                           | No                                           | No                                                             | No                            | No     |
| Recurrent Infections                      | Yes                           | No                                           | No (only rhinosinusitis)                                       | No                            | No     |
| Increased Freckle-like Pigmentation       | No                            | No                                           | No                                                             | Yes                           | No     |
| Skin Cancer                               | No                            | No                                           | No                                                             | Yes                           | No     |
| Pterygium                                 | No                            | No                                           | No                                                             | Yes                           | No     |
| Dilated ventricles (CT or MRI)            | No                            | No                                           | No (MRI nl at 10 yr)                                           | Yes                           | No     |
| Progressive Cognitive Impairment          | No                            | No                                           | IQ 40                                                          | Yes/No                        | No     |
| Axonal Neuropathy/Neuronal Degeneration   | No                            | Not tested                                   | EMG (normal 10 yr, mildly diminished sensory amplitudes 13 yr) | Yes                           | No     |
| Dysmyelination of the Brain (MRI)         | Yes                           | Not tested                                   | No (MRI nl at 10 yr)                                           | No                            | No     |
| <b>ABNORMAL CLINICAL LABORATORY TESTS</b> |                               |                                              |                                                                |                               |        |
| Low MCV                                   | Yes                           | Yes                                          | Yes                                                            | No                            | No     |
| RBC elevation                             | Yes                           | Yes (6.05x10 <sup>6</sup> /mm <sup>3</sup> ) | Yes (5.8x10 <sup>6</sup> /mm <sup>3</sup> )                    | No                            | No     |
| Neutropenia                               | Yes                           | Yes -21.2%                                   | Yes - 27%                                                      | No                            | No     |
| Elevation of Hgb A2                       | Yes                           | Yes                                          | Yes                                                            | No                            | No     |
| Reduced Hgb A                             | Yes                           | Yesm- 91.7%                                  | Yes - 87%                                                      | No                            | No     |
| Pregnancy Abnormalities                   | Yes                           | Yes (2.4 kg, IUGR)                           | No (birth wt nl)                                               | No                            | No     |

#### ABNORMAL RESEARCH LABORATORY TESTS

##### DNA REPAIR

|                                                  |     |    |    |     |    |
|--------------------------------------------------|-----|----|----|-----|----|
| Reduced post-UV cell survival                    | Yes | No | No | Yes | No |
| Reduced post-UV host cell reactivation           | Yes | No | No | Yes | No |
| Reduced repair of CPD - confocal                 | Yes | No | No | Yes | No |
| Reduced repair of 6-4PP - confocal               | No  | No | No | Yes | No |
| <b>Nucleotide Excision Repair (NER) PROTEINS</b> |     |    |    |     |    |
| Reduced XPB protein - Western                    | Yes | No | No | Yes | No |
| XPB protein - Absent localization to UV damage   | Yes | No | No | No  | No |
| Reduced XPD protein - Western                    | Yes | No | No | Yes | No |
| XPD protein - Absent localization to UV damage   | Yes | No | No | Yes | No |

##### TRANSCRIPTION PROTEINS

|                                                                     |            |     |     |    |    |
|---------------------------------------------------------------------|------------|-----|-----|----|----|
| Reduced TFIIIEβ protein - Western                                   | No         | Yes | Yes | No | No |
| Reduced TFIIIEβ protein - Confocal                                  | No         | Yes | Yes | No | No |
| Reduced TFIIIEβ protein - Confocal with UV                          | No         | Yes | Yes | No | No |
| TFIIIEβ protein - Confocal localization to UV damage                | No         | No  | No  | No | No |
| Reduced TFIIIEα protein - Western                                   | No         | Yes | Yes | No | No |
| Reduced phosphorylated TFIIIEα protein in confluent cells - Western | Yes        | Yes | Yes | No | No |
| Reduced TFIIIEα protein - Confocal with UV                          | not tested | Yes | Yes | No | No |
| TFIIIEα protein - Confocal localization to UV damage                | not tested | No  | No  | No | No |

**Figure S1.** Clinical and laboratory abnormalities in individuals with TTD or XP having mutations in *ERCC2* or with TTD having *GTF2E2* mutations. Abnormal clinical features (purple shading), abnormal clinical laboratory tests (light blue), abnormal research laboratory DNA repair tests (tan shading) and abnormal research laboratory tests of transcription proteins (pink shading) are listed in the first column. Typical findings in TTD individuals with mutations in *ERCC2* (*XPD*) with a predominant transcription defect are shown in the the second column. Features of TTD379BE and TTD28PV with mutations in *GTF2E2* are shown in columns 3 and 4. Typical finding in XP individuals with mutations in *ERCC2* (*XPD*) with a predominant DNA repair defect are shown in column 5. Findings in normal people are shown in the last column. Features that are present are indicated by “yes” with dark orange shading. Features that are absent are indicated by “no” with white background. Features that are present in some but not all affected individuals are indicated by “yes/no” with light orange shading. Subjects TTD379BE and TTD28PV have many (but not all) of the same clinical and laboratory test abnormalities that are present in TTD patients but their cells do not have the same DNA repair defects. Cells from subjects TTD379BE and TTD28PV have abnormalities in transcription proteins that are not found in cells from patients with TTD or with XP.

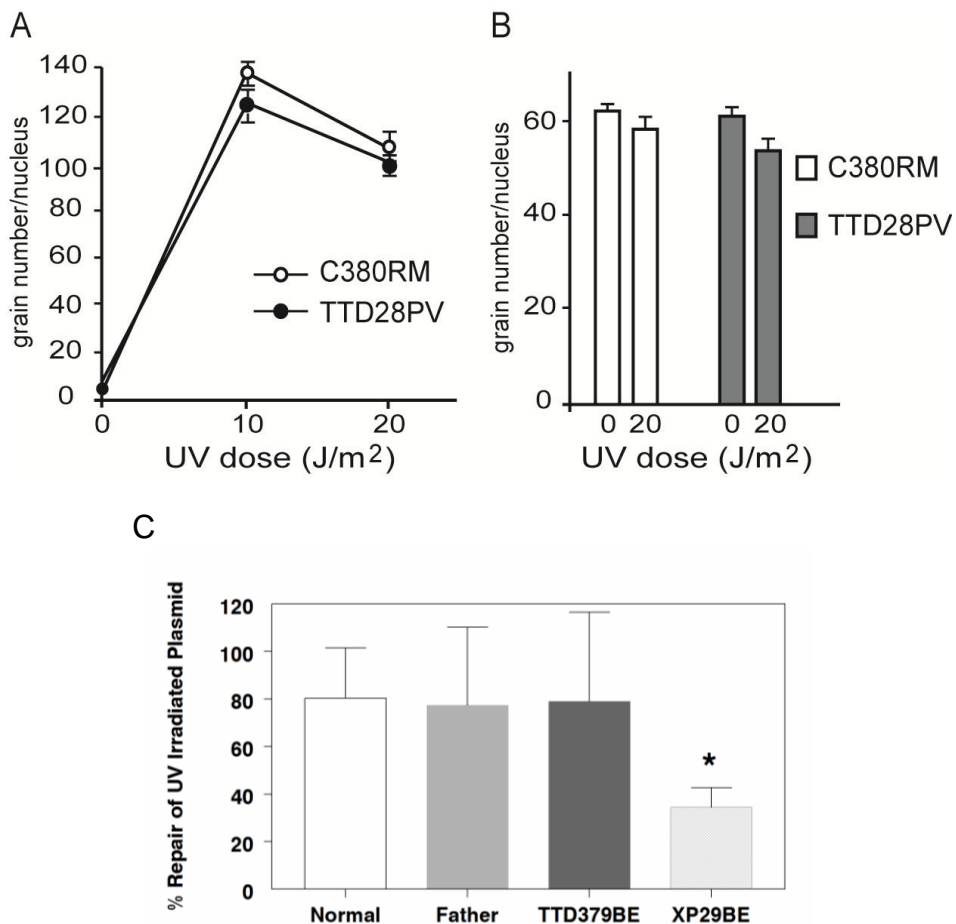

**Figure S2.** DNA repair responses to UV irradiation of the affected individuals TTD28PV and TTD379BE is similar to that of the normal controls.

A. UV-induced DNA repair synthesis (UDS) 3 hours after UV irradiation expressed as mean number of autoradiographic grains/nucleus. Bars indicate the SE. C380RM is a normal donor.

B. Recovery of RNA synthesis (RRS) 24 h after UV irradiation expressed as numbers of autoradiographic grains per nucleus. Bars indicate the SE.

C. Post-UV host cell reactivation in normal, father, TTD379BE and XP29BE [XP/XP-D] fibroblasts. Cells were transfected with a UV-C irradiated (500 J/m<sup>2</sup>) luciferase reporter vector and incubated for 48 hours. Repair of the plasmid is expressed as induced light units of active luciferase compared to a non-irradiated luciferase plasmid. One experiment with each sample in triplicate was performed. Error bars indicate SEM. \* indicates  $p < 0.05$  vs all others.



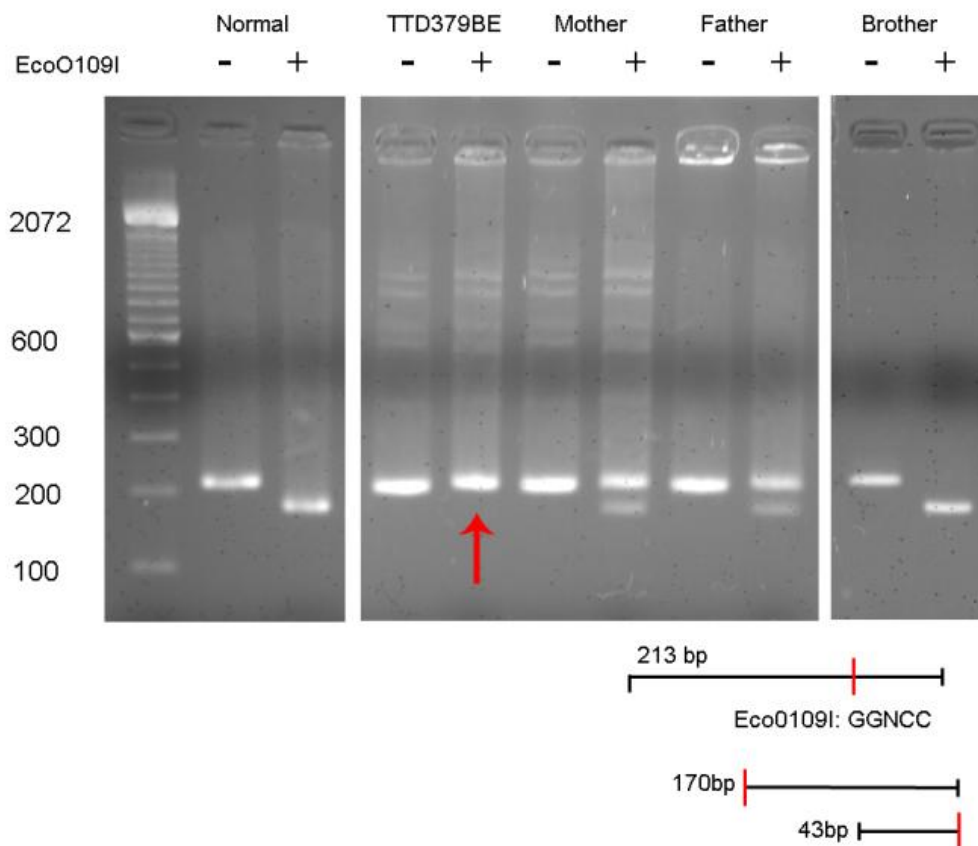

**Figure S3.** *GTF2E2* PCR and RFLP of genomic DNA from cells of affected boy TTD379BE and family members. The 213 bp region of *GTF2E2* DNA containing a G at cDNA position 448 can be digested with EcoO1091, resulting in fragments of 170 bp and 43 bp. The TTD379BE cells (IV-1 in figure 1C) had a c.448G>C mutation and thus was resistant to EcoO1091 digestion (arrow). DNA from the parents (III-3 and III-4 in Figure 1C) was heterozygous, resulting in digested and undigested amplifications while DNA from the brother (IV-2 in Figure 1C) was normal.

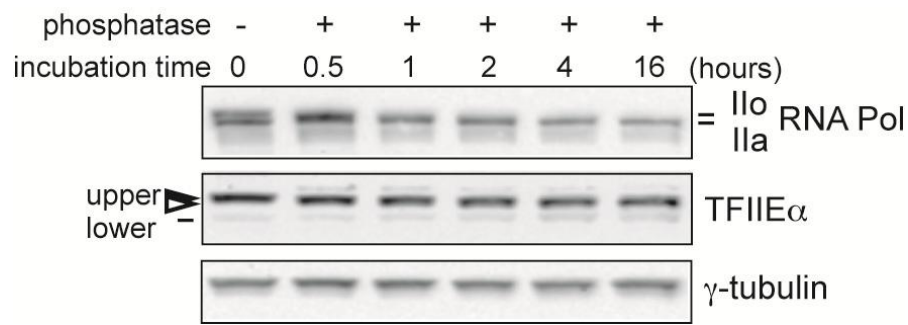

**Figure S4.** Immunoblot analysis of TFIIEα in the cell lysate from normal C3PV fibroblasts after phosphatase treatment. The lysate was incubated at 37°C with 3U/μl of calf intestinal phosphatase for the indicated time points. The phosphorylated (black arrowhead) and dephosphorylated (white arrowhead) upper TFIIEα bands are indicated. The phosphorylation status of RNA Pol II over the unphosphorylated RNA pol IIα was investigated in parallel. γ-tubulin is the loading control.

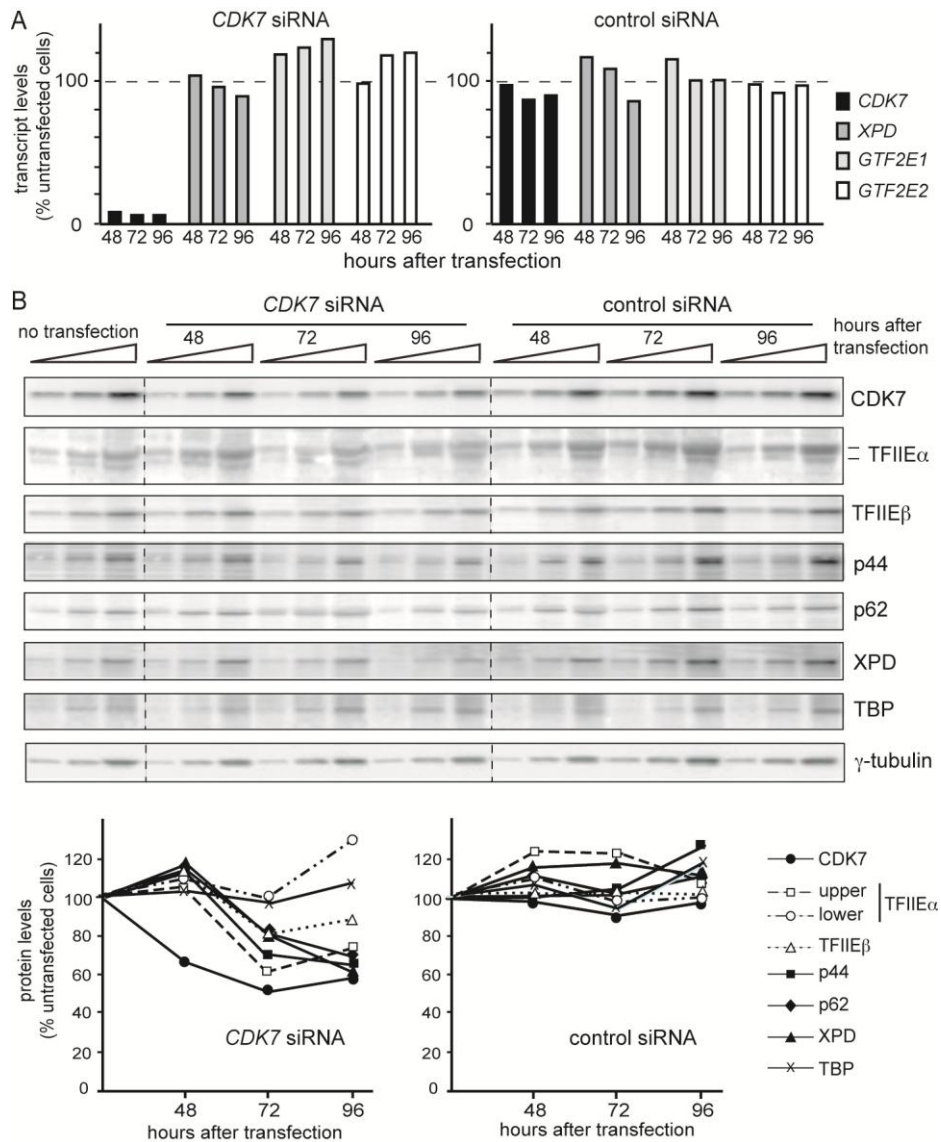

**Figure S5.** Reduced levels of TFII E and TFII H subunits in normal C3PV fibroblasts following *CDK7*

silencing. C3PV fibroblasts were transfected with *CDK7* or control siRNA and processed for transcript (A) and protein (B) levels after 48, 72 and 96 hours.

A. *CDK7*, *ERCC2* (*XPD*), *GTF2E1*, and *GTF2E2* transcript levels were normalized to *GAPDH* transcript level and expressed as percentages of the corresponding value in untransfected C3PV fibroblasts. The mean levels of a single experiment done in triplicate are reported. Standard errors of the mean were lower than 10%.

B. Immunoblot analysis of whole cell lysates. The levels of the TFII E subunits  $\alpha$  and  $\beta$ , of the TFII H subunits *CDK7*, *p44*, *p62* and *XPD* and of *TBP* were normalized to the  $\gamma$ -tubulin content and expressed as

percentages of the corresponding value in untransfected C3PV cells. The mean levels of the three increasing concentrations are reported. Standard errors of the mean were lower than 10%. Statistically significant reductions in the amount of the TFII $\alpha$  upper band ( $p < 0.005$ ) and in the amount of TFII $\beta$  ( $p < 0.05$ ) were observed 72-96 hours after siRNA transfection.

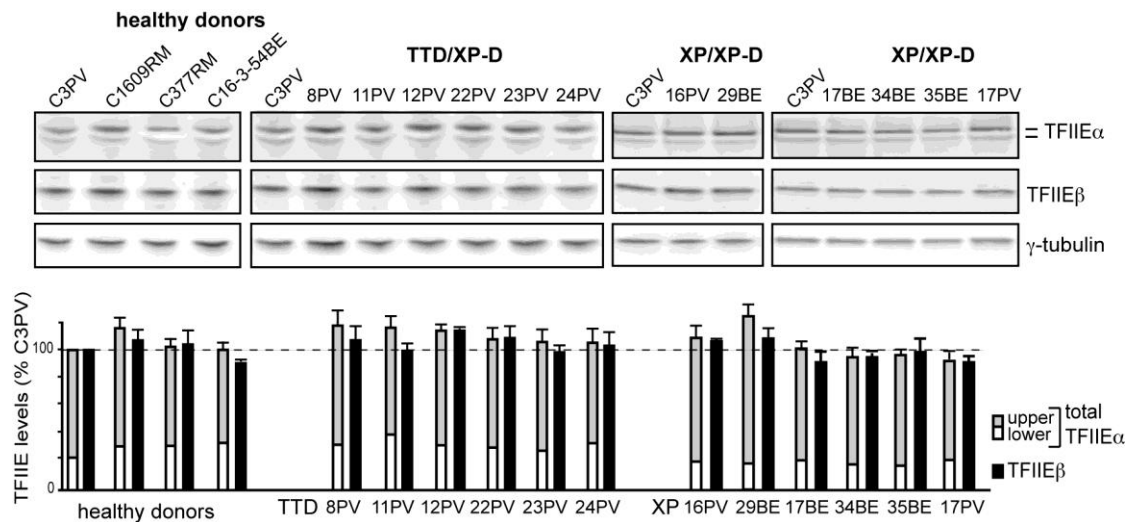

**Figure S6.** Normal TFIIΕα phosphorylation in proliferating TTD/XP-D and XP/XP-D primary fibroblasts. Immunoblot analysis of lysates obtained by directly scraping 4 normal (C3PV, C1609RM, C377RM and C16354BE), 6 TTD/XP-D (TTD8PV, TTD11PV, TTD12PV, TTD22PV, TTD23PV, and TTD24PV) and 6 XP/XP-D (XP16PV, XP29BE, XP17BE, XP34BE, XP35BE, and XP17PV) fibroblast strains in Laemmli buffer. The levels of the upper (grey) and lower (white) forms of TFIIΕα and of TFIIΕβ (black) were normalized to the γ-tubulin content and expressed as percentages of the corresponding values in C3PV cells. The reported values are the means of at least two independent experiments. Bars indicate the SE.

**Table S1.** Molecular features of the TTD and XP cells mutated in *ERCC2 (XPD)* analyzed in this study.

| Donor               | Phenotype <sup>a</sup> | Mutated alleles <sup>b</sup>                                                         | TFIIH levels <sup>c</sup> | References |
|---------------------|------------------------|--------------------------------------------------------------------------------------|---------------------------|------------|
| TTD8PV              | TTD                    | p.Arg112His (m)<br>p.Arg112His (p)                                                   | 34                        | 6, 7       |
| TTD11PV             | TTD                    | p.Arg112His (m)<br>p.Val121_Glu159del (p)                                            | 43                        | 6, 7       |
| TTD12PV             | TTD                    | p.Arg722Trp (m)<br>p.Cys259Tyr (p)                                                   | 65                        | 6, 7       |
| TTD22PV             | TTD                    | p.Gln662X<br>[p.Glu731Val731fsX100,<br>p.Glu731GlyfsX50,<br>p.Gly731_Gly735delins42] | 36                        | 8          |
| TTD23PV             | TTD                    | p.Arg112His<br>Not expressed                                                         | 60                        | 9, 10      |
| TTD24PV             | TTD                    | p.Arg722Trp (m)<br>[p.Glu317AspfsX110,<br>normal XPD] (p)                            | 55                        | 8          |
| TTD351BE            | TTD                    | p.Arg722Trp (m)<br>p.Arg378His (p)                                                   | N.D. <sup>e</sup>         | 11, 12     |
| XP16PV              | XP                     | p.Arg683Gln (m)<br>p.Arg683Gln (p)                                                   | 108                       | 7, 13      |
| XP29BE              | XP                     | p.Arg683Trp (m)<br>p.Gln452X (p)                                                     | 95                        | 14, 15     |
| XP17BE              | XP                     | p.Arg683Trp<br>p.Asp681Asn                                                           | 80                        | 11, 12     |
| XP34BE <sup>d</sup> | XP                     | p.Arg683Trp (m)<br>p.199insPP (p)                                                    | 80                        | 11, 14     |
| XP35BE <sup>d</sup> | XP                     | p.Arg683Trp (m)<br>p.199insPP (p)                                                    | 74                        | 11, 14     |
| XP17PV              | XP                     | p.Arg683Trp<br>p.Arg616Pro                                                           | 81                        | 7, 16      |

<sup>a</sup>TTD: trichothiodystrophy, XP: xeroderma pigmentosum

<sup>b</sup> in parentheses inheritance of the mutated alleles (m: maternal, p: paternal)

<sup>c</sup> TFIIH levels measured by immunoblot analysis expressed as a percentage of that in normal cells analyzed in parallel

<sup>d</sup> siblings

<sup>e</sup>Not determined

**Table S2.** cDNA and genomic primers used in this study

| Assay <sup>a</sup> | Gene          | Position <sup>b</sup>                                                                 | Primer                | Sequence 5'-3'          |
|--------------------|---------------|---------------------------------------------------------------------------------------|-----------------------|-------------------------|
| cDNA PCR           | <i>GTF2E2</i> | c.-21_-2                                                                              | GTF2E2-F1             | CTGCCCTTCTCACTCAGCAT    |
|                    |               | c.492_473                                                                             | GTF2E2-R1             | TCCTAATCCTCGCTGGTCAT    |
|                    | <i>GTF2E2</i> | c.251_270                                                                             | GTF2E2-F2             | ACATGAAGACACGGCAGCAG    |
|                    |               | c.+23_+4                                                                              | GTF2E2-R2             | CTGTTCCAGGGCAAACACTGT   |
|                    | <i>GTF2E1</i> | c.-48_-28                                                                             | GTF2E1-F1             | GTTCCAGGATTTCGCTTGTA    |
|                    |               | c.658_639                                                                             | GTF2E1-R1             | GGTCCTTGCTCTGTTTCAGG    |
|                    | <i>GTF2E1</i> | c.521_540                                                                             | GTF2E1-F2             | GCACACTTTTGGCAAGGTTT    |
|                    |               | c.+101_+82                                                                            | GTF2E1-R2             | ACATCAAGAGGGGCAGAAAG    |
| Genomic DNA PCR    | <i>GTF2E2</i> | 50944_50963                                                                           | GTF2E2-int5F          | TGGAGGACCCTATGGTGGTA    |
|                    |               | 51300_51277                                                                           | GTF2E2-int6R          | TGGCTGTGTTCTAAGAAATGATA |
| qPCR               | <i>GTF2E2</i> | c.675_694                                                                             | GTF2E2-F3             | AGATTCCATGGACGAGGAGA    |
|                    |               | c.795_776                                                                             | GTF2E2-R3             | CTGTGAAGCAGGCTTTTTCC    |
|                    |               | c.366-387                                                                             | GTF2E2 -F4            | GGCTTTAGTCAACAATCCAAA   |
|                    |               | c.532-513                                                                             | GTF2E2 -R4            | AATTGGGCAGTGCTTCTTCT    |
|                    | <i>GTF2E1</i> | c.798_817                                                                             | GTF2E1-F3             | AGCCTCACTGGAAGGGAAAT    |
|                    |               | c.967_948                                                                             | GTF2E1-R3             | GCATGACCTCTTCGTTGTCA    |
|                    | <i>CDK7</i>   | RT2 qPCR primer assay for human cdk7<br>PP00935E-200 (Qiagen Sciences, Maryland, USA) |                       |                         |
|                    | <i>XPD</i>    | c.2087_2108                                                                           | XPD-F                 | GGATCCAGGAGCACCTCACAGA  |
|                    |               | c.2176_2155                                                                           | XPD-R                 | GTGCCATCTGCCGCAGGAAGTA  |
|                    | <i>GAPDH</i>  | c.20_39                                                                               | GAPDH-F2              | GAGTCAACGGATTTGGTCGT    |
|                    |               | c.204_185                                                                             | GAPDH-R2              | GACAAGCTTCCCCTTCTCAG    |
|                    |               | c.453-473                                                                             | GAPDH-F               | TGCACCACCAACTGCTTAGC    |
| c.540-519          |               | GAPDH-R                                                                               | GGCATGGACTGTGGTCATGAG |                         |

<sup>a</sup> PCR amplified cDNA and genomic DNA fragments were sequenced using the corresponding F and R PCR primers.

<sup>b</sup> Positions of cDNA PCR primers and qPCR primers refer to the GenBank reference mRNA sequences NM\_002095.4 (*GTF2E2*), NM\_005513.2 (*GTF2E1*), NM\_001799.3 (*CDK7*), NM\_000400.3 (*XPD*), NM\_002046.3 (*GAPDH*). For cDNA numbering, +1 corresponds to the A of the ATG translation initiation codon in the reference sequence.

Positions of genomic DNA primers refer to the *GTF2E2* GenBank reference genomic sequence NC\_000008.10 nt 30436031-30515738.

**Table S3.** Predicted effect of mutations in GTF2E2 protein

| Mutation | PolyPhen <sup>17</sup>     | Sift <sup>18</sup> | MutationTaster <sup>19</sup> |
|----------|----------------------------|--------------------|------------------------------|
| A150P    | 0.835<br>possibly damaging | 0.22<br>tolerated  | 0.999<br>disease causing     |
| D187Y    | 0.997<br>probably damaging | 0.01<br>damaging   | 0.999<br>disease causing     |

## Supplemental References

1. Faghri, S., Tamura, D., Kraemer, K.H., and DiGiovanna, J.J. (2008). Trichothiodystrophy: a systematic review of 112 published cases characterises a wide spectrum of clinical manifestations. *J Med. Genet.* *45*, 609-621.
2. Heller, E. R., Khan, S.G., Kuschal, C., Tamura, D., DiGiovanna, J.J., and Kraemer, K.H. (2015). Mutations in the TTDN1 gene are associated with a distinct trichothiodystrophy phenotype. *J Invest Dermatol* *135*, 734-741.
3. Tamura, D., Merideth, M., DiGiovanna, J.J., Zhou, X., Tucker, M.A., Goldstein, A.M., Brooks, B.P., Khan, S.G., Oh, K.S., Ueda, T. et al. (2011). High-risk pregnancy and neonatal complications in the DNA repair and transcription disorder trichothiodystrophy: report of 27 affected pregnancies. *Prenat Diagn* *31*, 1046-1053.
4. DiGiovanna, J. J., and Kraemer, K.H. (2012). Shining a light on xeroderma pigmentosum. *J Invest Dermatol* *132*, 785-796.
5. Viprakasit, V., Gibbons, R.J., Broughton, B.C., Tolmie, J.L., Brown, D., Lunt, P., Winter, R.M., Marinoni, S., Stefanini, M., Brueton, L. et al. (2001). Mutations in the general transcription factor TFIIH result in beta- thalassaemia in individuals with trichothiodystrophy. *Hum. Mol. Genet.* *10*, 2797-2802.
6. Botta, E., Nardo, T., Broughton, B.C., Marinoni, S., Lehmann, A.R., and Stefanini, M. (1998). Analysis of mutations in the XPD gene in Italian patients with trichothiodystrophy: site of mutation correlates with repair deficiency, but gene dosage appears to determine clinical severity. *Am. J Hum. Genet.* *63*, 1036-1048.



7. Botta, E., Nardo, T., Lehmann, A.R., Egly, J.M., Pedrini, A.M., and Stefanini, M. (2002). Reduced level of the repair/transcription factor TFIIH in trichothiodystrophy. *Hum. Mol. Genet.* *11*, 2919-2928.
8. Botta, E., Nardo, T., Orioli, D., Guglielmino, R., Ricotti, R., Bondanza, S., Benedicenti, F., Zambruno, G., and Stefanini, M. (2009). Genotype-phenotype relationships in trichothiodystrophy patients with novel splicing mutations in the XPD gene. *Hum. Mutat.* *30*, 438-445.
9. Arseni, L., Lanzafame, M., Compe, E., Fortugno, P., Afonso-Barroso, A., Peverali, F.A., Lehmann, A.R., Zambruno, G., Egly, J.M., Stefanini, M. et al. (2015). TFIIH-dependent MMP-1 overexpression in trichothiodystrophy leads to extracellular matrix alterations in patient skin. *Proc. Natl Acad. Sci. U. S. A* *112*, 1499-1504.
10. Orioli, D., Compe, E., Nardo, T., Mura, M., Giraudon, C., Botta, E., Arrigoni, L., Peverali, F.A., Egly, J.M., and Stefanini, M. (2013). XPD mutations in trichothiodystrophy hamper collagen VI expression and reveal a role of TFIIH in transcription derepression. *Hum. Mol. Genet.* *22*, 1061-1073.
11. Boyle, J., Ueda, T., Oh, K.S., Imoto, K., Tamura, D., Jagdeo, J., Khan, S.G., Nadem, C., DiGiovanna, J.J., and Kraemer, K.H. (2008). Persistence of repair proteins at unrepaired DNA damage distinguishes diseases with ERCC2 (XPD) mutations: cancer-prone xeroderma pigmentosum vs. non-cancer-prone trichothiodystrophy. *Hum. Mutat.* *29*, 1194-1208.
12. Zhou, X., Khan, S.G., Tamura, D., Ueda, T., Boyle, J., Compe, E., Egly, J.M., DiGiovanna, J.J., and Kraemer, K.H. (2013). Abnormal XPD-induced nuclear receptor transactivation in DNA repair disorders: trichothiodystrophy and xeroderma pigmentosum. *Eur. J Hum. Genet.* *21*, 831-837.

13. Taylor, E. M., Broughton, B.C., Botta, E., Stefanini, M., Sarasin, A., Jaspers, N.G., Fawcett, H., Harcourt, S.A., Arlett, C.F., and Lehmann, A.R. (1997). Xeroderma pigmentosum and trichothiodystrophy are associated with different mutations in the XPD (ERCC2) repair/transcription gene. *Proc. Natl. Acad. Sci. U. S. A* *94*, 8658-8663.
14. Ueda, T., Compe, E., Catez, P., Kraemer, K.H., and Egly, J.M. (2009). Both XPD alleles contribute to the phenotype of compound heterozygote xeroderma pigmentosum patients. *J. Exp. Med.* *206*, 3031-3046.
15. Wang, Y., DiGiovanna, J.J., Stern, J.B., Hornyak, T.J., Raffeld, M., Khan, S.G., Oh, K.S., Hollander, M.C., Dennis, P.A., and Kraemer, K.H. (2009). Evidence of ultraviolet type mutations in xeroderma pigmentosum melanomas. *Proc. Natl. Acad. Sci. U. S. A* *106*, 6279-6284.
16. Takayama, K., Salazar, E.P., Lehmann, A., Stefanini, M., Thompson, L.H., and Weber, C.A. (1995). Defects in the DNA repair and transcription gene ERCC2 in the cancer-prone disorder xeroderma pigmentosum group D. *Cancer Res.* *55*, 5656-5663.
17. Adzhubei, I. A., Schmidt, S., Peshkin, L., Ramensky, V.E., Gerasimova, A., Bork, P., Kondrashov, A.S., and Sunyaev, S.R. (2010). A method and server for predicting damaging missense mutations. *Nat. Methods* *7*, 248-249.
18. Kumar, P., Henikoff, S., and Ng, P.C. (2009). Predicting the effects of coding non-synonymous variants on protein function using the SIFT algorithm. *Nat. Protoc.* *4*, 1073-1081.
19. Schwarz, J. M., Cooper, D.N., Schuelke, M., and Seelow, D. (2014). MutationTaster2: mutation prediction for the deep-sequencing age. *Nat. Methods* *11*, 361-362.
